# Supplementary material for: Computational study of linear carbon chain based organic dyes for dye sensitized solar cells
Source: Royal Society of Chemistry journal article supplement (doi:10.1039/d2ra06767f), 2023-01-01

# Computational study of Linear carbon chain based organic dyes for Dye sensitized solar cells.

Giuseppe Consiglio<sup>a</sup>, Adam Gorczyński<sup>b</sup>, Salvatore Petralia<sup>c</sup> and Giuseppe Forte<sup>\*c</sup>

<sup>a</sup> Department of Chemical Science University of Catania, Via S. Sofia 64, 95125, Italy,

<sup>b</sup> Faculty of Chemistry, Adam Mickiewicz University, Uniwersytetu Poznańskiego 8, 61-614 Poznań, Poland

<sup>c</sup> Department of Drug Science and Health University of Catania, Via S. Sofia 64, 95125, Italy.

Email [gforte@unict.it](mailto:gforte@unict.it)

Electronic supplementary information (ESI) available

## Electronic Supplementary Information:

Optimized geometry and frequencies of dyes at B3LYP-6-311+G(3df,3pd)/SMD level

### BZ-S

|   |              |             |             |
|---|--------------|-------------|-------------|
| C | -2.75121100  | -0.81802800 | 0.11794400  |
| C | -3.18092300  | -2.13409200 | 0.24263600  |
| S | -4.11163500  | 0.25237100  | -0.01185100 |
| C | -4.56587700  | -2.26938300 | 0.23542200  |
| H | -2.50466800  | -2.96848300 | 0.34243700  |
| C | -5.25475500  | -1.06595500 | 0.10408200  |
| H | -5.08388900  | -3.21358900 | 0.32519100  |
| C | -6.66239900  | -0.97852500 | 0.07402700  |
| H | -7.15027300  | -1.94100300 | 0.16191500  |
| C | -7.50476800  | 0.09798000  | -0.04541700 |
| C | -7.04356200  | 1.43287400  | -0.17021400 |
| C | -8.96950700  | -0.04949600 | -0.05428800 |
| O | -9.38236100  | -1.32535300 | 0.06639900  |
| H | -10.35319100 | -1.32469400 | 0.04837500  |
| O | -9.74476700  | 0.87761300  | -0.15945700 |
| N | -6.66561300  | 2.51920100  | -0.27180400 |
| C | 2.66392600   | 1.11787300  | 0.02669100  |
| C | 3.12304900   | 2.41535000  | 0.04757200  |
| S | 4.02973200   | 0.01360300  | -0.05348600 |
| C | 4.52364100   | 2.54380800  | -0.00556000 |
| H | 2.46448500   | 3.26989200  | 0.09897300  |
| C | 5.17031900   | 1.32653900  | -0.05617500 |
| H | 5.05371600   | 3.48491100  | 0.00643000  |
| H | 7.06341300   | 1.98899000  | 0.12909500  |
| C | 7.23763500   | -0.03400600 | -0.18579500 |
| C | 6.93691800   | -1.16376500 | -0.90160400 |
| S | 8.74755300   | -0.22420900 | 0.67027600  |
| C | 7.93167100   | -2.17342100 | -0.77207400 |
| H | 6.06463300   | -1.26259000 | -1.52805300 |
| C | 8.97568500   | -1.80941100 | 0.02157500  |
| H | 7.87691900   | -3.12715200 | -1.27672500 |
| H | 9.87120100   | -2.36102100 | 0.25603400  |
| N | 6.53074600   | 1.14947300  | -0.05095300 |
| C | -1.38669700  | -0.32173900 | 0.09085800  |
| C | -0.29811000  | -1.21058500 | 0.10605200  |
| C | -1.09171700  | 1.05307100  | 0.04919400  |
| C | 1.00296800   | -0.75034900 | 0.08589600  |
| H | -0.46820500  | -2.27715000 | 0.13234900  |
| C | 0.20745300   | 1.51371200  | 0.02608000  |

|   |             |             |             |
|---|-------------|-------------|-------------|
| H | -1.89179100 | 1.78183500  | 0.03681200  |
| C | 1.30084500  | 0.62465600  | 0.04582000  |
| H | 1.80231700  | -1.47945900 | 0.10488600  |
| H | 0.37852300  | 2.57981900  | -0.00931100 |

|                |           |           |           |
|----------------|-----------|-----------|-----------|
| Frequencies -- | 10.3096   | 22.8701   | 27.1546   |
| Frequencies -- | 31.3853   | 33.6537   | 44.3940   |
| Frequencies -- | 45.8370   | 57.3989   | 62.1386   |
| Frequencies -- | 76.4805   | 97.2163   | 112.0247  |
| Frequencies -- | 135.2229  | 146.5442  | 162.6517  |
| Frequencies -- | 182.2577  | 204.6744  | 225.2564  |
| Frequencies -- | 246.3113  | 270.5411  | 290.4176  |
| Frequencies -- | 315.5824  | 336.8531  | 351.3191  |
| Frequencies -- | 365.3909  | 403.1363  | 406.2141  |
| Frequencies -- | 418.4799  | 435.9986  | 445.9758  |
| Frequencies -- | 458.0285  | 487.5888  | 495.3677  |
| Frequencies -- | 497.0479  | 509.0535  | 535.2828  |
| Frequencies -- | 557.2483  | 565.9529  | 586.4534  |
| Frequencies -- | 595.5336  | 611.9866  | 612.4679  |
| Frequencies -- | 619.8949  | 643.2819  | 644.7499  |
| Frequencies -- | 669.4517  | 680.4394  | 690.0661  |
| Frequencies -- | 698.8137  | 728.5618  | 732.5705  |
| Frequencies -- | 733.2883  | 752.5668  | 762.4402  |
| Frequencies -- | 777.1484  | 791.7631  | 815.3613  |
| Frequencies -- | 824.3091  | 826.0924  | 827.2027  |
| Frequencies -- | 830.2936  | 849.1755  | 854.0201  |
| Frequencies -- | 909.1556  | 923.9098  | 937.0505  |
| Frequencies -- | 957.4252  | 966.7320  | 971.2477  |
| Frequencies -- | 977.3004  | 991.6781  | 1023.8495 |
| Frequencies -- | 1062.1958 | 1069.6122 | 1079.5959 |
| Frequencies -- | 1099.4356 | 1100.5188 | 1143.6250 |
| Frequencies -- | 1147.9360 | 1151.4005 | 1206.6317 |
| Frequencies -- | 1221.1317 | 1229.6842 | 1255.7915 |
| Frequencies -- | 1261.0217 | 1272.4535 | 1299.2182 |
| Frequencies -- | 1307.8571 | 1324.9940 | 1328.5889 |
| Frequencies -- | 1345.9547 | 1362.5156 | 1381.9211 |
| Frequencies -- | 1394.0030 | 1401.1249 | 1434.8405 |
| Frequencies -- | 1454.3448 | 1473.9582 | 1481.3126 |
| Frequencies -- | 1513.2426 | 1518.8215 | 1550.2706 |
| Frequencies -- | 1567.7488 | 1570.8065 | 1583.7440 |
| Frequencies -- | 1588.5053 | 1633.3931 | 1726.1663 |
| Frequencies -- | 2300.0722 | 3173.9971 | 3175.5526 |
| Frequencies -- | 3185.3102 | 3199.1890 | 3202.3379 |
| Frequencies -- | 3204.5207 | 3205.0912 | 3209.3819 |
| Frequencies -- | 3216.8620 | 3226.7341 | 3230.7583 |
| Frequencies -- | 3249.6238 | 3577.5957 | 3715.7607 |

## BZ-N

|   |            |             |             |
|---|------------|-------------|-------------|
| C | 2.44619000 | -0.83858800 | -0.09179100 |
| C | 2.89289400 | -2.15275000 | -0.18351800 |
| S | 3.79421100 | 0.25110200  | 0.01157800  |
| C | 4.27871700 | -2.27091500 | -0.17222800 |
| H | 2.22703000 | -2.99778800 | -0.26154700 |
| C | 4.95390300 | -1.05603700 | -0.07053300 |
| H | 4.80817700 | -3.21081300 | -0.23732200 |
| C | 6.35916500 | -0.94988700 | -0.04133200 |
| H | 6.86001300 | -1.90742200 | -0.10588300 |
| C | 7.18828600 | 0.14056600  | 0.05393900  |
| C | 6.71019300 | 1.47184700  | 0.14742100  |

|   |              |             |             |
|---|--------------|-------------|-------------|
| C | 8.65399600   | 0.01249800  | 0.06882700  |
| O | 9.08500500   | -1.26020700 | -0.02381600 |
| H | 10.05561600  | -1.24465400 | -0.00298000 |
| O | 9.41732000   | 0.95170100  | 0.15574500  |
| N | 6.31889300   | 2.55570600  | 0.22311400  |
| C | -2.98621000  | 1.04301500  | -0.05723300 |
| C | -3.45843200  | 2.33814400  | -0.07438600 |
| S | -4.34570400  | -0.07235100 | -0.01278700 |
| C | -4.85747300  | 2.45532000  | -0.04607000 |
| H | -2.80599600  | 3.19838800  | -0.10636500 |
| C | -5.49883700  | 1.22987700  | -0.01695700 |
| H | -5.39519300  | 3.39212900  | -0.05514800 |
| H | -7.39199500  | 1.89663200  | -0.11660600 |
| C | -7.57389600  | -0.12998600 | 0.08221300  |
| C | -7.24740500  | -1.40756700 | 0.50081900  |
| C | -8.43478300  | -2.19060700 | 0.39112500  |
| H | -6.29512000  | -1.74320600 | 0.86880300  |
| C | -9.43407400  | -1.37757500 | -0.07800000 |
| H | -8.53206500  | -3.23436200 | 0.63996500  |
| H | -10.47012100 | -1.57048800 | -0.29377300 |
| N | -6.85093300  | 1.04746200  | -0.02423300 |
| C | 1.07776800   | -0.35762600 | -0.07807100 |
| C | -0.00295400  | -1.25707400 | -0.09489500 |
| C | 0.76786300   | 1.01498600  | -0.04834800 |
| C | -1.30819400  | -0.80993800 | -0.08750200 |
| H | 0.17775100   | -2.32214300 | -0.11246200 |
| C | -0.53507900  | 1.46301600  | -0.03958100 |
| H | 1.56072400   | 1.75165300  | -0.03369100 |
| C | -1.62134500  | 0.56327700  | -0.06137400 |
| H | -2.10022800  | -1.54707600 | -0.10451900 |
| H | -0.71659200  | 2.52771000  | -0.01446100 |
| H | -9.39639100  | 0.67335100  | -0.62770700 |
| N | -8.89682700  | -0.12571800 | -0.26853100 |

|                |           |           |           |
|----------------|-----------|-----------|-----------|
| Frequencies -- | 9.8653    | 23.1121   | 24.7332   |
| Frequencies -- | 30.0490   | 39.8869   | 47.1055   |
| Frequencies -- | 54.0485   | 58.6543   | 62.6880   |
| Frequencies -- | 76.2508   | 102.3952  | 112.0315  |
| Frequencies -- | 141.8900  | 148.7075  | 164.5376  |
| Frequencies -- | 184.1428  | 215.8562  | 227.0680  |
| Frequencies -- | 262.9904  | 274.0184  | 304.8090  |
| Frequencies -- | 314.5477  | 334.6980  | 361.6451  |
| Frequencies -- | 370.8035  | 393.7625  | 408.1269  |
| Frequencies -- | 415.5194  | 437.4314  | 446.1985  |
| Frequencies -- | 469.7384  | 476.0149  | 486.8332  |
| Frequencies -- | 495.1670  | 509.5292  | 534.1522  |
| Frequencies -- | 556.6276  | 588.9586  | 612.3235  |
| Frequencies -- | 618.1844  | 620.0230  | 624.2370  |
| Frequencies -- | 642.8580  | 644.8231  | 650.0700  |
| Frequencies -- | 668.8022  | 672.9583  | 698.4166  |
| Frequencies -- | 706.5654  | 727.8636  | 732.8803  |
| Frequencies -- | 750.4633  | 759.1844  | 762.6935  |
| Frequencies -- | 776.7569  | 785.8287  | 797.4171  |
| Frequencies -- | 825.9547  | 827.1310  | 830.3600  |
| Frequencies -- | 853.5342  | 869.0674  | 898.8215  |
| Frequencies -- | 909.9502  | 936.3132  | 956.9374  |
| Frequencies -- | 966.1529  | 969.1602  | 978.0306  |
| Frequencies -- | 992.1028  | 993.5261  | 1022.1294 |
| Frequencies -- | 1047.2368 | 1068.4793 | 1080.4208 |
| Frequencies -- | 1100.4519 | 1116.9095 | 1127.6019 |
| Frequencies -- | 1143.2186 | 1148.9761 | 1203.9720 |

|                |           |           |           |
|----------------|-----------|-----------|-----------|
| Frequencies -- | 1216.4983 | 1223.4266 | 1229.7775 |
| Frequencies -- | 1255.7147 | 1269.2620 | 1297.6333 |
| Frequencies -- | 1301.4453 | 1309.7021 | 1325.1969 |
| Frequencies -- | 1340.2584 | 1345.0585 | 1369.7192 |
| Frequencies -- | 1382.1235 | 1401.2406 | 1420.2093 |
| Frequencies -- | 1430.4750 | 1443.3498 | 1457.5018 |
| Frequencies -- | 1477.1568 | 1507.1531 | 1511.8374 |
| Frequencies -- | 1524.2758 | 1556.1943 | 1566.2291 |
| Frequencies -- | 1583.6088 | 1597.7596 | 1607.2644 |
| Frequencies -- | 1633.8136 | 1724.6051 | 2298.4601 |
| Frequencies -- | 3173.6895 | 3174.8638 | 3185.1666 |
| Frequencies -- | 3197.4850 | 3201.2658 | 3204.2645 |
| Frequencies -- | 3208.9712 | 3215.9960 | 3230.5186 |
| Frequencies -- | 3237.1945 | 3267.1437 | 3271.4196 |
| Frequencies -- | 3565.6395 | 3625.4646 | 3715.8777 |

#### PY-4S

|   |              |             |             |
|---|--------------|-------------|-------------|
| C | -4.26104700  | -1.12322200 | -0.00083200 |
| C | -3.06220600  | -0.85332200 | -0.00171600 |
| C | -1.75938400  | -0.56007600 | -0.00192500 |
| C | -0.55859900  | -0.28590100 | -0.00319800 |
| C | 0.74140200   | 0.01329000  | -0.00331900 |
| C | 1.93959100   | 0.29054800  | -0.00416300 |
| C | 3.24432000   | 0.59358300  | -0.00355000 |
| C | 4.43536600   | 0.87284700  | -0.00329700 |
| C | 5.79175600   | 1.18213300  | -0.00224900 |
| C | 6.38302400   | 2.44184500  | -0.00119700 |
| S | 6.99879200   | -0.09057800 | -0.00187500 |
| C | 7.77957000   | 2.38496800  | 0.00002400  |
| H | 5.80350000   | 3.35458000  | -0.00123100 |
| C | 8.29996000   | 1.09209300  | -0.00007300 |
| H | 8.42156700   | 3.25684000  | 0.00104500  |
| C | 9.69531300   | 0.82018700  | 0.00134900  |
| H | 10.30461700  | 1.71780200  | 0.00251100  |
| C | 10.38298800  | -0.36445600 | 0.00158400  |
| C | 9.74618500   | -1.63484800 | 0.00017400  |
| C | 11.86196200  | -0.41677000 | 0.00334200  |
| O | 12.43678300  | 0.80091500  | 0.00440900  |
| H | 13.40221400  | 0.67761000  | 0.00565400  |
| O | 12.50189500  | -1.44832600 | 0.00382200  |
| N | 9.22319700   | -2.66712000 | -0.00104000 |
| C | -5.61081100  | -1.40808400 | -0.00024500 |
| C | -6.25433700  | -2.64125300 | 0.00017000  |
| S | -6.81348500  | -0.09689200 | 0.00016300  |
| C | -7.64884700  | -2.56166600 | 0.00069700  |
| H | -5.70325200  | -3.57257000 | 0.00004700  |
| C | -8.12461200  | -1.25145900 | 0.00071400  |
| H | -8.31316500  | -3.41606100 | 0.00103300  |
| H | -10.06379500 | -1.72690400 | 0.00147900  |
| C | -10.06467600 | 0.32250400  | 0.00120900  |
| C | -9.54867000  | 1.59621100  | 0.00112400  |
| S | -11.82299600 | 0.35361100  | 0.00142600  |
| C | -10.56775500 | 2.59822500  | 0.00124100  |
| H | -8.49827600  | 1.84308400  | 0.00103500  |
| C | -11.83289800 | 2.09626000  | 0.00141400  |
| H | -10.35136400 | 3.65892800  | 0.00120700  |
| H | -12.77743400 | 2.61931700  | 0.00154600  |
| N | -9.44842300  | -0.92051000 | 0.00114600  |

|                |           |           |           |
|----------------|-----------|-----------|-----------|
| Frequencies -- | 16.6769   | 23.6803   | 31.2298   |
| Frequencies -- | 36.2900   | 45.6578   | 56.3790   |
| Frequencies -- | 65.2539   | 68.5903   | 76.6821   |
| Frequencies -- | 77.3461   | 86.5522   | 101.5304  |
| Frequencies -- | 114.2791  | 125.9067  | 136.6550  |
| Frequencies -- | 155.6479  | 164.0544  | 187.7441  |
| Frequencies -- | 206.8391  | 209.7054  | 248.2797  |
| Frequencies -- | 255.1617  | 270.8977  | 276.1139  |
| Frequencies -- | 296.0014  | 309.8628  | 336.7639  |
| Frequencies -- | 341.7770  | 408.6150  | 413.1090  |
| Frequencies -- | 427.9235  | 443.8281  | 444.9124  |
| Frequencies -- | 486.3947  | 488.8713  | 504.2243  |
| Frequencies -- | 511.7497  | 523.6897  | 530.7507  |
| Frequencies -- | 546.8093  | 551.7404  | 564.1262  |
| Frequencies -- | 568.4072  | 574.9359  | 587.5088  |
| Frequencies -- | 598.2876  | 603.6518  | 624.0219  |
| Frequencies -- | 628.2569  | 630.7623  | 652.3027  |
| Frequencies -- | 664.5209  | 673.0946  | 689.0921  |
| Frequencies -- | 693.5739  | 698.4219  | 714.4608  |
| Frequencies -- | 719.3784  | 738.4099  | 756.1474  |
| Frequencies -- | 782.0647  | 794.6111  | 808.2564  |
| Frequencies -- | 809.7351  | 820.9604  | 831.4875  |
| Frequencies -- | 836.1847  | 851.8219  | 916.7622  |
| Frequencies -- | 930.0411  | 934.8962  | 956.0954  |
| Frequencies -- | 989.5653  | 1049.3379 | 1069.4415 |
| Frequencies -- | 1074.9847 | 1091.0368 | 1096.4596 |
| Frequencies -- | 1130.2130 | 1137.5842 | 1155.7120 |
| Frequencies -- | 1196.4184 | 1230.0638 | 1247.0804 |
| Frequencies -- | 1266.7765 | 1277.7977 | 1287.3719 |
| Frequencies -- | 1338.8969 | 1359.1847 | 1372.5232 |
| Frequencies -- | 1386.0108 | 1398.7415 | 1426.5594 |
| Frequencies -- | 1444.1531 | 1473.2996 | 1474.6026 |
| Frequencies -- | 1514.1901 | 1541.6171 | 1560.2415 |
| Frequencies -- | 1579.4571 | 1595.5580 | 1718.9269 |
| Frequencies -- | 2083.7280 | 2112.0289 | 2214.3600 |
| Frequencies -- | 2235.3060 | 2284.0270 | 3173.5684 |
| Frequencies -- | 3187.9699 | 3190.9842 | 3194.8250 |
| Frequencies -- | 3204.2127 | 3214.4157 | 3224.6613 |
| Frequencies -- | 3232.1995 | 3525.4368 | 3681.1013 |

#### PY-4N

|   |             |             |             |
|---|-------------|-------------|-------------|
| C | -4.70318300 | -1.09139700 | 0.00077300  |
| C | -3.50031400 | -0.83105900 | 0.00075900  |
| C | -2.19728600 | -0.54724600 | 0.00071400  |
| C | -0.99368600 | -0.27914800 | 0.00065300  |
| C | 0.30632900  | 0.01437900  | 0.00063400  |
| C | 1.50635800  | 0.28792200  | 0.00057200  |
| C | 2.81088000  | 0.58846100  | 0.00058700  |
| C | 4.00289500  | 0.86616800  | 0.00057000  |
| C | 5.35898100  | 1.17365100  | 0.00055800  |
| C | 5.95241200  | 2.43303800  | 0.00100500  |
| S | 6.56521700  | -0.10040500 | -0.00006800 |
| C | 7.34841000  | 2.37466800  | 0.00087100  |
| H | 5.37390700  | 3.34642100  | 0.00141700  |
| C | 7.86831200  | 1.08114000  | 0.00029800  |
| H | 7.99122800  | 3.24597500  | 0.00117000  |
| C | 9.26250700  | 0.80810200  | 0.00009500  |
| H | 9.87270400  | 1.70512300  | 0.00053400  |
| C | 9.94999800  | -0.37749900 | -0.00056400 |
| C | 9.31258800  | -1.64735100 | -0.00132700 |
| C | 11.42831600 | -0.43040900 | -0.00059100 |

|   |              |             |             |
|---|--------------|-------------|-------------|
| O | 12.00409700  | 0.78719900  | 0.00010500  |
| H | 12.96934900  | 0.66284600  | 0.00004500  |
| O | 12.06857000  | -1.46202000 | -0.00116900 |
| N | 8.78920900   | -2.67953700 | -0.00196600 |
| C | -6.05260800  | -1.36190700 | 0.00072400  |
| C | -6.71073500  | -2.59061200 | 0.00107300  |
| S | -7.24595900  | -0.03752200 | 0.00014100  |
| C | -8.10182700  | -2.49973800 | 0.00090400  |
| H | -6.16757800  | -3.52671700 | 0.00144200  |
| C | -8.56783900  | -1.18207200 | 0.00038800  |
| H | -8.77413400  | -3.34783100 | 0.00112000  |
| H | -10.52472600 | -1.60998600 | 0.00013400  |
| C | -10.45871300 | 0.43545300  | -0.00040600 |
| C | -9.94473000  | 1.72419900  | -0.00029500 |
| C | -11.06411900 | 2.61063000  | -0.00102000 |
| H | -8.90895600  | 2.01754300  | 0.00032800  |
| C | -12.20859500 | 1.84794100  | -0.00192100 |
| H | -11.01949500 | 3.68924200  | -0.00104000 |
| H | -13.25140600 | 2.12067000  | -0.00274100 |
| N | -9.87726700  | -0.82787600 | 0.00006500  |
| H | -12.46224800 | -0.26342900 | -0.00156200 |
| N | -11.82826100 | 0.52479200  | -0.00150400 |

|                |           |           |           |
|----------------|-----------|-----------|-----------|
| Frequencies -- | 16.9330   | 24.3009   | 32.6342   |
| Frequencies -- | 36.2940   | 44.2662   | 66.2517   |
| Frequencies -- | 66.3862   | 74.1610   | 77.1938   |
| Frequencies -- | 80.4987   | 87.0041   | 101.9666  |
| Frequencies -- | 114.2175  | 126.3697  | 141.7071  |
| Frequencies -- | 155.4598  | 164.8660  | 188.3296  |
| Frequencies -- | 206.8911  | 216.5370  | 251.0628  |
| Frequencies -- | 275.1225  | 280.6259  | 291.9822  |
| Frequencies -- | 310.0324  | 313.3363  | 339.8602  |
| Frequencies -- | 349.7302  | 408.8889  | 422.7348  |
| Frequencies -- | 428.3836  | 440.2960  | 445.9810  |
| Frequencies -- | 478.0526  | 491.1800  | 493.5942  |
| Frequencies -- | 507.6965  | 512.7712  | 525.4163  |
| Frequencies -- | 542.8377  | 552.0484  | 561.1465  |
| Frequencies -- | 595.2420  | 597.3840  | 600.2352  |
| Frequencies -- | 618.0113  | 627.1929  | 627.6886  |
| Frequencies -- | 630.9905  | 651.3748  | 655.0226  |
| Frequencies -- | 655.7090  | 664.0300  | 686.2134  |
| Frequencies -- | 693.8288  | 698.1310  | 718.8969  |
| Frequencies -- | 736.8206  | 755.7357  | 763.3423  |
| Frequencies -- | 781.8690  | 791.1358  | 802.0499  |
| Frequencies -- | 817.5947  | 821.0093  | 850.8065  |
| Frequencies -- | 880.3159  | 896.4600  | 917.2241  |
| Frequencies -- | 933.3738  | 955.4928  | 988.1339  |
| Frequencies -- | 988.9444  | 1048.1901 | 1054.9323 |
| Frequencies -- | 1071.8046 | 1091.4440 | 1116.4214 |
| Frequencies -- | 1123.0738 | 1130.9770 | 1154.8820 |
| Frequencies -- | 1193.9671 | 1206.1835 | 1233.1410 |
| Frequencies -- | 1258.5247 | 1269.9140 | 1286.6731 |
| Frequencies -- | 1299.9893 | 1347.5710 | 1367.5667 |
| Frequencies -- | 1377.4634 | 1398.4381 | 1416.6077 |
| Frequencies -- | 1422.5064 | 1442.9314 | 1447.4213 |
| Frequencies -- | 1474.3714 | 1492.5466 | 1513.8071 |
| Frequencies -- | 1547.0717 | 1578.4051 | 1589.5622 |
| Frequencies -- | 1609.8259 | 1717.7784 | 2066.1980 |
| Frequencies -- | 2106.2130 | 2209.8810 | 2230.7511 |
| Frequencies -- | 2282.9635 | 3173.3718 | 3189.8530 |
| Frequencies -- | 3194.3282 | 3202.9718 | 3214.1099 |
| Frequencies -- | 3219.6520 | 3250.6060 | 3256.1193 |

Frequencies -- 3524.4638            3589.9375            3681.6034

**PY-3S**

|   |              |             |             |
|---|--------------|-------------|-------------|
| C | -3.00017600  | 0.90628800  | 0.05381100  |
| C | -1.82524500  | 0.56118200  | 0.04554900  |
| C | -0.53888300  | 0.19834600  | 0.03427200  |
| C | 0.64370900   | -0.12542600 | 0.02299100  |
| C | 1.93664700   | -0.47297500 | 0.00871300  |
| C | 3.11526900   | -0.78919700 | -0.00610200 |
| C | 4.46152100   | -1.13168500 | -0.02551100 |
| C | 5.02202000   | -2.40343700 | -0.06878900 |
| S | 5.69128500   | 0.09904000  | 0.00230700  |
| C | 6.41406600   | -2.37707100 | -0.08114700 |
| H | 4.42279200   | -3.30035800 | -0.09068300 |
| C | 6.96122200   | -1.09728400 | -0.04689200 |
| H | 7.03639700   | -3.25965200 | -0.11411000 |
| C | 8.35771800   | -0.85601700 | -0.05564900 |
| H | 8.94700400   | -1.76298900 | -0.09764700 |
| C | 9.06754100   | 0.31171700  | -0.02051800 |
| C | 8.45360500   | 1.58958900  | 0.04340200  |
| C | 10.54356300  | 0.33983100  | -0.04323700 |
| O | 11.10160800  | -0.88116800 | -0.10108500 |
| H | 12.06644100  | -0.76631500 | -0.11317000 |
| O | 11.19767500  | 1.35929700  | -0.01358400 |
| N | 7.94841800   | 2.62578100  | 0.09679600  |
| C | -4.32455900  | 1.29250600  | 0.06199000  |
| C | -4.85853900  | 2.57242400  | 0.05360100  |
| S | -5.62209100  | 0.09564300  | 0.10597000  |
| C | -6.25291700  | 2.60852500  | 0.08594700  |
| H | -4.23309500  | 3.45248000  | 0.02661100  |
| C | -6.82856700  | 1.34504800  | 0.10623900  |
| H | -6.84424900  | 3.51214600  | 0.08191700  |
| H | -8.74491800  | 1.92166600  | -0.04727700 |
| C | -8.81096500  | -0.12945400 | 0.13927800  |
| C | -8.48371100  | -1.25510800 | 0.84751200  |
| S | -10.24349100 | -0.38810800 | -0.82138000 |
| C | -9.39735000  | -2.32254200 | 0.62518700  |
| H | -7.65150900  | -1.31375000 | 1.53155400  |
| C | -10.40667400 | -2.00116700 | -0.23020100 |
| H | -9.31385600  | -3.28544900 | 1.10753200  |
| H | -11.24463000 | -2.60358600 | -0.54064700 |
| N | -8.16865900  | 1.10150600  | 0.08609800  |

|                |          |          |          |
|----------------|----------|----------|----------|
| Frequencies -- | 4.1226   | 9.8592   | 16.5726  |
| Frequencies -- | 23.6488  | 29.0259  | 40.4774  |
| Frequencies -- | 49.2838  | 57.0939  | 64.8257  |
| Frequencies -- | 74.8395  | 84.1917  | 101.9825 |
| Frequencies -- | 123.5895 | 133.3437 | 141.4136 |
| Frequencies -- | 162.2691 | 179.9222 | 215.0264 |
| Frequencies -- | 228.8573 | 230.1970 | 263.2160 |
| Frequencies -- | 267.2092 | 296.1155 | 325.9388 |
| Frequencies -- | 335.7370 | 351.5437 | 401.3957 |
| Frequencies -- | 412.0105 | 430.2687 | 441.7721 |
| Frequencies -- | 463.7468 | 468.0354 | 494.6731 |
| Frequencies -- | 497.9163 | 507.3869 | 511.0092 |
| Frequencies -- | 518.3610 | 544.7422 | 566.2399 |
| Frequencies -- | 572.7317 | 577.7656 | 592.3824 |
| Frequencies -- | 601.4417 | 609.7049 | 617.2009 |
| Frequencies -- | 622.4801 | 656.7547 | 670.7776 |
| Frequencies -- | 682.2350 | 692.4416 | 701.7104 |

|                |           |           |           |
|----------------|-----------|-----------|-----------|
| Frequencies -- | 722.8563  | 739.9058  | 750.5211  |
| Frequencies -- | 777.9823  | 778.5329  | 787.4811  |
| Frequencies -- | 801.2510  | 802.6171  | 813.7585  |
| Frequencies -- | 826.3235  | 839.6579  | 840.4566  |
| Frequencies -- | 850.7874  | 928.3436  | 928.4715  |
| Frequencies -- | 946.3576  | 977.0563  | 1019.0219 |
| Frequencies -- | 1061.7521 | 1068.3125 | 1088.7107 |
| Frequencies -- | 1099.9016 | 1108.7474 | 1146.2875 |
| Frequencies -- | 1156.1242 | 1189.8011 | 1223.6364 |
| Frequencies -- | 1247.5624 | 1268.7960 | 1272.7489 |
| Frequencies -- | 1291.7455 | 1331.8396 | 1352.1437 |
| Frequencies -- | 1376.8239 | 1392.3808 | 1401.7885 |
| Frequencies -- | 1426.0406 | 1444.4455 | 1473.1923 |
| Frequencies -- | 1480.4924 | 1512.1376 | 1543.6806 |
| Frequencies -- | 1572.0954 | 1578.5673 | 1590.4699 |
| Frequencies -- | 1733.5210 | 2132.6045 | 2188.6608 |
| Frequencies -- | 2253.5667 | 2306.8568 | 3190.7160 |
| Frequencies -- | 3206.8475 | 3211.0386 | 3214.3208 |
| Frequencies -- | 3223.9968 | 3225.2232 | 3234.3689 |
| Frequencies -- | 3247.8409 | 3568.4988 | 3701.4648 |

**PY-3N**

|   |              |             |             |
|---|--------------|-------------|-------------|
| C | 3.39517500   | 0.91862700  | -0.02823800 |
| C | 2.21232700   | 0.59581200  | -0.02857400 |
| C | 0.92262900   | 0.25049400  | -0.02642100 |
| C | -0.26303700  | -0.06628900 | -0.02267800 |
| C | -1.55520000  | -0.41326000 | -0.01599700 |
| C | -2.73318200  | -0.73479200 | -0.00777700 |
| C | -4.07543500  | -1.08947300 | 0.00489800  |
| C | -4.62336200  | -2.36802000 | 0.03182000  |
| S | -5.31873700  | 0.12838100  | -0.00990100 |
| C | -6.01500400  | -2.35656000 | 0.04191000  |
| H | -4.01470700  | -3.25877200 | 0.04400400  |
| C | -6.57666300  | -1.08225700 | 0.02228000  |
| H | -6.62788800  | -3.24611600 | 0.06305100  |
| C | -7.97468900  | -0.85648000 | 0.03135400  |
| H | -8.55430300  | -1.77026500 | 0.05932300  |
| C | -8.69771900  | 0.30450200  | 0.01164900  |
| C | -8.09747200  | 1.58952700  | -0.03098200 |
| C | -10.17325700 | 0.31651200  | 0.03151200  |
| O | -10.71926600 | -0.91116800 | 0.06767300  |
| H | -11.68509700 | -0.80554900 | 0.07977500  |
| O | -10.83868800 | 1.32924800  | 0.01744000  |
| N | -7.60336800  | 2.63192600  | -0.06703300 |
| C | 4.72821300   | 1.26331200  | -0.02595000 |
| C | 5.30949500   | 2.52577000  | -0.02653700 |
| S | 5.98589300   | 0.02198000  | -0.03191200 |
| C | 6.70117600   | 2.51375600  | -0.03645600 |
| H | 4.71455000   | 3.42714300  | -0.02000000 |
| C | 7.23657500   | 1.22760200  | -0.02999900 |
| H | 7.32374200   | 3.39620600  | -0.03696500 |
| H | 9.16923900   | 1.74844600  | 0.07350400  |
| C | 9.18592700   | -0.29617500 | -0.02335000 |
| C | 8.77819200   | -1.54926400 | -0.44231400 |
| C | 9.87661800   | -2.42970500 | -0.22343800 |
| H | 7.83293700   | -1.80808300 | -0.88415400 |
| C | 10.90634400  | -1.69437800 | 0.30743200  |
| H | 9.89928300   | -3.48384900 | -0.44411400 |
| H | 11.90097000  | -1.97324900 | 0.60772700  |
| N | 8.56062900   | 0.94286100  | 0.00093800  |



|   |             |             |            |
|---|-------------|-------------|------------|
| H | 11.01261400 | 0.36435200  | 0.81290700 |
| N | 10.47301000 | -0.39710800 | 0.43012100 |

|                |           |           |           |
|----------------|-----------|-----------|-----------|
| Frequencies -- | 6.4961    | 12.0490   | 16.9096   |
| Frequencies -- | 23.1332   | 29.3361   | 38.7165   |
| Frequencies -- | 55.0916   | 58.9337   | 66.8496   |
| Frequencies -- | 77.2608   | 86.0857   | 107.3646  |
| Frequencies -- | 125.4938  | 137.3716  | 144.6340  |
| Frequencies -- | 165.2310  | 181.5946  | 218.8675  |
| Frequencies -- | 230.9148  | 243.8819  | 266.8684  |
| Frequencies -- | 277.9817  | 311.2368  | 325.6839  |
| Frequencies -- | 338.5406  | 365.8770  | 402.1395  |
| Frequencies -- | 414.8344  | 429.4387  | 442.1770  |
| Frequencies -- | 466.3488  | 476.1100  | 489.4353  |
| Frequencies -- | 499.5172  | 505.7673  | 511.0162  |
| Frequencies -- | 516.2315  | 543.1488  | 571.8983  |
| Frequencies -- | 575.5024  | 595.6796  | 608.0561  |
| Frequencies -- | 621.8703  | 622.5615  | 624.6925  |
| Frequencies -- | 644.1828  | 660.8332  | 670.7682  |
| Frequencies -- | 675.0220  | 701.4338  | 711.3522  |
| Frequencies -- | 729.3199  | 749.3527  | 764.7485  |
| Frequencies -- | 767.9371  | 776.0241  | 778.3268  |
| Frequencies -- | 790.6016  | 797.7854  | 805.4864  |
| Frequencies -- | 826.5955  | 840.6955  | 875.1467  |
| Frequencies -- | 898.6569  | 928.6075  | 947.5267  |
| Frequencies -- | 978.9905  | 993.3348  | 1019.2620 |
| Frequencies -- | 1049.8039 | 1068.0577 | 1088.9241 |
| Frequencies -- | 1109.8682 | 1115.2958 | 1127.7637 |
| Frequencies -- | 1153.0350 | 1187.8799 | 1211.6404 |
| Frequencies -- | 1227.3248 | 1256.8725 | 1276.1972 |
| Frequencies -- | 1288.4753 | 1301.6763 | 1333.9792 |
| Frequencies -- | 1367.1469 | 1380.8266 | 1400.8099 |
| Frequencies -- | 1420.8426 | 1425.7897 | 1431.5029 |
| Frequencies -- | 1458.5654 | 1479.0588 | 1502.4975 |
| Frequencies -- | 1514.9418 | 1556.0843 | 1587.1993 |
| Frequencies -- | 1594.6008 | 1606.1950 | 1732.1649 |
| Frequencies -- | 2121.0828 | 2180.9598 | 2249.1511 |
| Frequencies -- | 2305.4760 | 3189.3731 | 3209.9229 |
| Frequencies -- | 3214.2820 | 3223.5537 | 3233.9561 |
| Frequencies -- | 3239.6871 | 3266.0437 | 3271.6088 |
| Frequencies -- | 3559.3098 | 3622.4836 | 3702.4895 |

**PY-2S**

|   |             |             |             |
|---|-------------|-------------|-------------|
| C | 1.74465000  | 0.72886800  | 0.04718000  |
| C | 0.59326700  | 0.31820000  | 0.03262300  |
| C | -0.67502500 | -0.12070500 | 0.01275000  |
| C | -1.82804600 | -0.51918000 | -0.00702500 |
| C | -3.14746300 | -0.95168200 | -0.03198400 |
| C | -3.62419400 | -2.25811500 | -0.08702100 |
| S | -4.45650600 | 0.19423700  | 0.00451600  |
| C | -5.01403800 | -2.32402800 | -0.10121900 |
| H | -2.96718800 | -3.11349600 | -0.11586900 |
| C | -5.64705500 | -1.08336800 | -0.05687500 |
| H | -5.57634800 | -3.24569700 | -0.14301400 |
| C | -7.05366700 | -0.93282600 | -0.06484900 |
| H | -7.58369400 | -1.87527100 | -0.11491800 |
| C | -7.84069300 | 0.18651900  | -0.02028900 |
| C | -7.31311300 | 1.50130200  | 0.05373100  |
| C | -9.31356200 | 0.11647600  | -0.04213300 |
| O | -9.79099400 | -1.13864300 | -0.11514000 |

|   |              |             |             |
|---|--------------|-------------|-------------|
| H | -10.76089900 | -1.08624900 | -0.12493400 |
| O | -10.03561700 | 1.08922900  | 0.00033300  |
| N | -6.87850600  | 2.56893300  | 0.11457800  |
| C | 3.04972000   | 1.18230100  | 0.06109500  |
| C | 3.52113100   | 2.48536500  | 0.05538100  |
| S | 4.40205800   | 0.04905300  | 0.10813000  |
| C | 4.91363900   | 2.58848200  | 0.09164600  |
| H | 2.85473800   | 3.33489400  | 0.02742700  |
| C | 5.54816100   | 1.35453900  | 0.11296000  |
| H | 5.46090900   | 3.51942100  | 0.08997100  |
| H | 7.44229500   | 2.00939200  | -0.04396000 |
| C | 7.58597400   | -0.03810800 | 0.15648000  |
| C | 7.32349400   | -1.15227900 | 0.90806700  |
| S | 8.98699000   | -0.28026900 | -0.85360000 |
| C | 8.26143600   | -2.19684900 | 0.67963800  |
| H | 6.51913200   | -1.21528800 | 1.62450700  |
| C | 9.22589900   | -1.86876900 | -0.22408200 |
| H | 8.22907400   | -3.14699700 | 1.19244200  |
| H | 10.07125500  | -2.45308300 | -0.54889600 |
| N | 6.89848400   | 1.16856300  | 0.09606700  |

|                |           |           |           |
|----------------|-----------|-----------|-----------|
| Frequencies -- | 9.6882    | 16.2229   | 19.7414   |
| Frequencies -- | 26.5948   | 36.6849   | 43.2294   |
| Frequencies -- | 52.3134   | 60.0910   | 71.0224   |
| Frequencies -- | 87.7510   | 99.4964   | 113.1578  |
| Frequencies -- | 146.4071  | 154.9468  | 165.3096  |
| Frequencies -- | 192.7867  | 218.9306  | 232.0950  |
| Frequencies -- | 247.3364  | 258.0659  | 308.5822  |
| Frequencies -- | 318.8531  | 338.5119  | 349.0858  |
| Frequencies -- | 401.4012  | 426.0903  | 434.0850  |
| Frequencies -- | 442.7372  | 467.1368  | 485.9954  |
| Frequencies -- | 498.0204  | 499.9786  | 504.0760  |
| Frequencies -- | 524.0964  | 529.1815  | 547.0644  |
| Frequencies -- | 566.6895  | 590.1717  | 598.2994  |
| Frequencies -- | 599.0976  | 611.6058  | 619.6318  |
| Frequencies -- | 635.5658  | 641.9871  | 665.6870  |
| Frequencies -- | 675.0208  | 684.0809  | 692.6984  |
| Frequencies -- | 701.4018  | 729.0028  | 746.5589  |
| Frequencies -- | 755.3032  | 777.6712  | 797.9236  |
| Frequencies -- | 813.1193  | 827.4323  | 833.7384  |
| Frequencies -- | 840.3423  | 851.2069  | 910.1649  |
| Frequencies -- | 923.8431  | 927.4353  | 940.1621  |
| Frequencies -- | 972.0733  | 1057.8301 | 1062.6755 |
| Frequencies -- | 1074.4963 | 1093.8432 | 1099.2275 |
| Frequencies -- | 1143.3783 | 1148.6771 | 1164.6455 |
| Frequencies -- | 1212.2672 | 1237.0602 | 1260.5622 |
| Frequencies -- | 1269.4160 | 1286.3656 | 1319.0115 |
| Frequencies -- | 1351.1335 | 1368.6280 | 1389.2607 |
| Frequencies -- | 1402.7609 | 1415.3937 | 1444.4099 |
| Frequencies -- | 1471.8499 | 1477.4711 | 1509.2013 |
| Frequencies -- | 1529.2553 | 1572.2624 | 1578.5958 |
| Frequencies -- | 1589.6392 | 1730.1544 | 2193.5371 |
| Frequencies -- | 2217.1761 | 2304.0351 | 3184.2981 |
| Frequencies -- | 3206.6661 | 3209.7545 | 3212.9080 |
| Frequencies -- | 3222.8469 | 3224.6192 | 3232.5699 |
| Frequencies -- | 3246.6218 | 3571.4854 | 3708.8761 |

**PY-2N**

|   |            |            |            |
|---|------------|------------|------------|
| C | 2.09672800 | 0.66599400 | 0.01801100 |
| C | 0.93889200 | 0.26926800 | 0.02424700 |

|   |              |             |             |
|---|--------------|-------------|-------------|
| C | -0.33349000  | -0.15348000 | 0.03119600  |
| C | -1.49194100  | -0.53948300 | 0.03798500  |
| C | -2.81435500  | -0.95884600 | 0.04598500  |
| C | -3.30434200  | -2.26206200 | 0.08696000  |
| S | -4.11379300  | 0.19889500  | 0.00203400  |
| C | -4.69389700  | -2.31566500 | 0.08443200  |
| H | -2.65527500  | -3.12341900 | 0.11756400  |
| C | -5.31690000  | -1.06918800 | 0.04080200  |
| H | -5.26453800  | -3.23274700 | 0.11331700  |
| C | -6.72080500  | -0.90732900 | 0.03228300  |
| H | -7.25908300  | -1.84575800 | 0.06871600  |
| C | -7.49913300  | 0.21949700  | -0.01450600 |
| C | -6.96037000  | 1.53020800  | -0.07249100 |
| C | -8.97167000  | 0.16117500  | -0.01288200 |
| O | -9.46069900  | -1.09072900 | 0.04622800  |
| H | -10.43008700 | -1.02942700 | 0.04141200  |
| O | -9.68643200  | 1.13953100  | -0.05939500 |
| N | -6.51710700  | 2.59512300  | -0.12026200 |
| C | 3.40561600   | 1.10004700  | 0.01115300  |
| C | 3.89941100   | 2.39814300  | 0.00761300  |
| S | 4.74320900   | -0.05256600 | -0.00851600 |
| C | 5.28946700   | 2.48050800  | -0.01497000 |
| H | 3.24528500   | 3.25751900  | 0.02030700  |
| C | 5.91077000   | 1.23425100  | -0.01762700 |
| H | 5.85089100   | 3.40303900  | -0.02016100 |
| H | 7.80460000   | 1.88541200  | 0.05933400  |
| C | 7.96097200   | -0.15246500 | -0.04940100 |
| C | 7.62208200   | -1.43772600 | -0.43163000 |
| C | 8.79092900   | -2.23506100 | -0.26292300 |
| H | 6.67537200   | -1.77074000 | -0.81654300 |
| C | 9.79206300   | -1.42126700 | 0.20352700  |
| H | 8.87670300   | -3.28817400 | -0.47284600 |
| H | 10.81841600  | -1.62439300 | 0.45355800  |
| N | 7.25233200   | 1.03951800  | -0.00345000 |
| H | 9.77802800   | 0.64652600  | 0.68084500  |
| N | 9.27419100   | -0.15587800 | 0.33470700  |

|                |           |           |           |
|----------------|-----------|-----------|-----------|
| Frequencies -- | 11.2343   | 18.1946   | 20.1677   |
| Frequencies -- | 23.3009   | 37.8958   | 44.2628   |
| Frequencies -- | 58.2560   | 60.0872   | 73.3998   |
| Frequencies -- | 92.5703   | 101.8898  | 122.8859  |
| Frequencies -- | 147.7316  | 157.6131  | 166.2534  |
| Frequencies -- | 202.7762  | 220.5367  | 235.0394  |
| Frequencies -- | 257.9468  | 273.7253  | 316.1609  |
| Frequencies -- | 325.4619  | 331.9950  | 365.7666  |
| Frequencies -- | 403.6416  | 430.6483  | 436.6865  |
| Frequencies -- | 444.6858  | 468.8193  | 479.5855  |
| Frequencies -- | 497.5242  | 498.9173  | 504.6699  |
| Frequencies -- | 522.5905  | 536.8703  | 544.8932  |
| Frequencies -- | 593.1178  | 595.8909  | 609.4270  |
| Frequencies -- | 617.7817  | 623.4216  | 625.7355  |
| Frequencies -- | 641.2072  | 649.5282  | 666.6404  |
| Frequencies -- | 674.5064  | 677.4042  | 701.2908  |
| Frequencies -- | 710.6141  | 742.1339  | 755.1646  |
| Frequencies -- | 767.3251  | 777.3465  | 793.3573  |
| Frequencies -- | 796.5295  | 827.8124  | 834.0213  |
| Frequencies -- | 874.3853  | 898.2210  | 910.4997  |
| Frequencies -- | 925.5278  | 941.6990  | 973.7053  |
| Frequencies -- | 994.0168  | 1049.7874 | 1061.4162 |
| Frequencies -- | 1076.0573 | 1094.8405 | 1118.0715 |
| Frequencies -- | 1127.5388 | 1144.6339 | 1163.6933 |
| Frequencies -- | 1209.4371 | 1213.3488 | 1245.7328 |

|                |           |           |           |
|----------------|-----------|-----------|-----------|
| Frequencies -- | 1271.0591 | 1288.1614 | 1295.6024 |
| Frequencies -- | 1325.4214 | 1364.6727 | 1372.5628 |
| Frequencies -- | 1401.7789 | 1410.6847 | 1424.7804 |
| Frequencies -- | 1444.3706 | 1447.9698 | 1476.6304 |
| Frequencies -- | 1502.8601 | 1511.4662 | 1538.2417 |
| Frequencies -- | 1587.7814 | 1596.1604 | 1606.5131 |
| Frequencies -- | 1728.4044 | 2186.9773 | 2206.7603 |
| Frequencies -- | 2302.2004 | 3186.4761 | 3209.3475 |
| Frequencies -- | 3212.8336 | 3222.8142 | 3232.3039 |
| Frequencies -- | 3239.2559 | 3266.5070 | 3271.5390 |
| Frequencies -- | 3550.5193 | 3623.5549 | 3708.6770 |

**PY-1S**

|   |             |             |             |
|---|-------------|-------------|-------------|
| C | -0.51583100 | 0.42498000  | 0.05598400  |
| C | 0.59699200  | -0.06818900 | 0.02732400  |
| C | 1.87015900  | -0.61987400 | -0.00434700 |
| C | 2.21988000  | -1.96869300 | -0.04562000 |
| S | 3.28470700  | 0.39374100  | 0.00580900  |
| C | 3.59442500  | -2.16902000 | -0.06851500 |
| H | 1.48297600  | -2.75682100 | -0.05793300 |
| C | 4.34910300  | -0.99592100 | -0.04578300 |
| H | 4.06355800  | -3.14192700 | -0.10108800 |
| C | 5.75898800  | -0.98735200 | -0.06303600 |
| H | 6.19027500  | -1.97960300 | -0.09760000 |
| C | 6.66082000  | 0.04725600  | -0.04321300 |
| C | 6.27247400  | 1.40969100  | 0.00237700  |
| C | 8.11496300  | -0.17849200 | -0.06782200 |
| O | 8.45553500  | -1.48022000 | -0.11344800 |
| H | 9.42519100  | -1.53223700 | -0.12795400 |
| O | 8.94082500  | 0.71000000  | -0.04970700 |
| N | 5.94986900  | 2.51788500  | 0.03948000  |
| C | -1.78948900 | 0.96712900  | 0.08824300  |
| C | -2.17220600 | 2.29702800  | 0.13287800  |
| S | -3.21189300 | -0.07450200 | 0.09810000  |
| C | -3.55568700 | 2.49074300  | 0.17902900  |
| H | -1.45127700 | 3.10134800  | 0.13408000  |
| C | -4.27037800 | 1.30217800  | 0.15708000  |
| H | -4.03924100 | 3.45566100  | 0.21465800  |
| H | -6.11704500 | 2.08830300  | 0.04182300  |
| C | -6.39899800 | 0.04894900  | 0.15709900  |
| C | -6.20161000 | -1.11775100 | 0.84685800  |
| S | -7.83257100 | -0.04498100 | -0.83231200 |
| C | -7.21478600 | -2.08210200 | 0.58802100  |
| H | -5.39098900 | -1.27305900 | 1.54168900  |
| C | -8.17084800 | -1.64306200 | -0.27652400 |
| H | -7.23896300 | -3.05723400 | 1.05214700  |
| H | -9.06068000 | -2.15041300 | -0.61201900 |
| N | -5.63078400 | 1.20706400  | 0.13933200  |

|                |          |          |          |
|----------------|----------|----------|----------|
| Frequencies -- | 13.1747  | 16.7681  | 24.5927  |
| Frequencies -- | 26.7891  | 49.8434  | 51.6842  |
| Frequencies -- | 60.1255  | 61.5362  | 79.7295  |
| Frequencies -- | 101.1328 | 125.0322 | 135.6725 |
| Frequencies -- | 153.8347 | 186.8453 | 200.2188 |
| Frequencies -- | 221.2464 | 249.2967 | 253.8117 |
| Frequencies -- | 307.1951 | 310.0139 | 329.9528 |
| Frequencies -- | 372.8237 | 397.2984 | 420.9628 |
| Frequencies -- | 435.1924 | 448.6047 | 472.5303 |
| Frequencies -- | 492.8841 | 499.0223 | 506.6551 |
| Frequencies -- | 529.5773 | 545.0619 | 556.5423 |

|                |           |           |           |
|----------------|-----------|-----------|-----------|
| Frequencies -- | 564.5247  | 572.9732  | 589.6729  |
| Frequencies -- | 603.3164  | 606.0307  | 617.7001  |
| Frequencies -- | 646.9505  | 665.5116  | 681.4478  |
| Frequencies -- | 695.5046  | 697.6430  | 713.0502  |
| Frequencies -- | 732.9041  | 748.8115  | 769.9419  |
| Frequencies -- | 776.0406  | 792.0404  | 810.8316  |
| Frequencies -- | 824.9379  | 826.6341  | 839.7126  |
| Frequencies -- | 850.7558  | 918.3339  | 927.3339  |
| Frequencies -- | 933.9692  | 967.2537  | 1022.3218 |
| Frequencies -- | 1062.0158 | 1069.3766 | 1087.1219 |
| Frequencies -- | 1094.8976 | 1116.5142 | 1143.6811 |
| Frequencies -- | 1151.2734 | 1202.9368 | 1224.3043 |
| Frequencies -- | 1252.1373 | 1269.3804 | 1281.3180 |
| Frequencies -- | 1298.1418 | 1339.1214 | 1365.2130 |
| Frequencies -- | 1386.9735 | 1396.2097 | 1404.3565 |
| Frequencies -- | 1424.6291 | 1472.7360 | 1481.1726 |
| Frequencies -- | 1503.6626 | 1546.6617 | 1571.5437 |
| Frequencies -- | 1575.2075 | 1587.8667 | 1725.7779 |
| Frequencies -- | 2216.1320 | 2299.2565 | 3189.1848 |
| Frequencies -- | 3206.4272 | 3209.0195 | 3210.2982 |
| Frequencies -- | 3221.7509 | 3226.9442 | 3228.5652 |
| Frequencies -- | 3245.3200 | 3572.4756 | 3710.3516 |

**PY-1N**

|   |             |             |             |
|---|-------------|-------------|-------------|
| C | -0.84506700 | 0.42309300  | -0.04674200 |
| C | 0.27470800  | -0.05813600 | -0.05855700 |
| C | 1.54880800  | -0.60343400 | -0.07313700 |
| C | 1.90239900  | -1.95229900 | -0.13239100 |
| S | 2.96305300  | 0.41074000  | -0.01500600 |
| C | 3.27599900  | -2.15090000 | -0.13333500 |
| H | 1.16667200  | -2.74051800 | -0.17418100 |
| C | 4.03064600  | -0.97786000 | -0.07230600 |
| H | 3.74650200  | -3.12275400 | -0.17602700 |
| C | 5.43872300  | -0.96956700 | -0.05737400 |
| H | 5.87037500  | -1.96075900 | -0.11314100 |
| C | 6.34232600  | 0.06288600  | 0.02069800  |
| C | 5.95558100  | 1.42323500  | 0.10944600  |
| C | 7.79504000  | -0.16570500 | 0.02801400  |
| O | 8.13531200  | -1.46496900 | -0.07555700 |
| H | 9.10460400  | -1.51920500 | -0.05321600 |
| O | 8.62271700  | 0.71715300  | 0.11952800  |
| N | 5.63574300  | 2.53071000  | 0.18221800  |
| C | -2.12737200 | 0.93847500  | -0.03392800 |
| C | -2.54498300 | 2.26163500  | -0.02717200 |
| S | -3.52637400 | -0.13598900 | -0.00835200 |
| C | -3.92942600 | 2.42346000  | 0.00240100  |
| H | -1.84328300 | 3.08264600  | -0.04270700 |
| C | -4.61979500 | 1.21497900  | 0.00743100  |
| H | -4.43644500 | 3.37693900  | 0.01101600  |
| H | -6.47833000 | 1.96539500  | -0.07033100 |
| C | -6.73923000 | -0.06070900 | 0.06900700  |
| C | -6.47565500 | -1.34119500 | 0.51943100  |
| C | -7.67475000 | -2.09039500 | 0.34358600  |
| H | -5.55934900 | -1.69798200 | 0.95374700  |
| C | -8.61926300 | -1.25315100 | -0.19430600 |
| H | -7.81872900 | -3.12738600 | 0.59755000  |
| H | -9.64533600 | -1.41987200 | -0.47118800 |
| N | -5.97062700 | 1.09254600  | -0.00439000 |
| N | -8.03690600 | -0.02088900 | -0.36330200 |
| H | -8.48738700 | 0.78697000  | -0.76585300 |

|                |           |           |           |
|----------------|-----------|-----------|-----------|
| Frequencies -- | 15.2495   | 17.2737   | 29.5608   |
| Frequencies -- | 44.0689   | 55.1033   | 61.8855   |
| Frequencies -- | 62.8524   | 73.6022   | 87.0424   |
| Frequencies -- | 107.4785  | 128.9565  | 145.7375  |
| Frequencies -- | 155.1992  | 187.9342  | 203.4414  |
| Frequencies -- | 235.3228  | 252.8052  | 266.8913  |
| Frequencies -- | 309.8145  | 326.9453  | 336.4900  |
| Frequencies -- | 390.7037  | 401.8490  | 430.6791  |
| Frequencies -- | 436.2340  | 449.6635  | 475.8225  |
| Frequencies -- | 497.3340  | 503.0283  | 506.5580  |
| Frequencies -- | 528.5116  | 547.6681  | 554.3494  |
| Frequencies -- | 580.9068  | 593.4119  | 606.1545  |
| Frequencies -- | 616.2400  | 624.0229  | 643.8974  |
| Frequencies -- | 655.7705  | 664.2794  | 676.9396  |
| Frequencies -- | 697.2838  | 711.4003  | 714.1050  |
| Frequencies -- | 745.2068  | 767.6388  | 774.2387  |
| Frequencies -- | 779.0866  | 787.4050  | 793.5345  |
| Frequencies -- | 824.6340  | 826.3087  | 875.5304  |
| Frequencies -- | 898.2874  | 920.1328  | 932.1854  |
| Frequencies -- | 963.6824  | 992.7388  | 1021.6025 |
| Frequencies -- | 1048.8615 | 1069.5144 | 1087.3784 |
| Frequencies -- | 1115.8106 | 1120.2521 | 1127.3688 |
| Frequencies -- | 1145.8512 | 1201.4297 | 1213.4625 |
| Frequencies -- | 1227.1641 | 1260.7228 | 1281.7188 |
| Frequencies -- | 1297.5075 | 1300.7922 | 1353.2343 |
| Frequencies -- | 1370.3156 | 1394.3387 | 1403.4842 |
| Frequencies -- | 1416.6125 | 1426.4359 | 1451.7583 |
| Frequencies -- | 1482.0494 | 1501.7748 | 1504.7748 |
| Frequencies -- | 1561.8409 | 1578.4704 | 1597.3159 |
| Frequencies -- | 1607.0954 | 1723.9112 | 2206.6556 |
| Frequencies -- | 2296.4026 | 3189.0083 | 3209.2737 |
| Frequencies -- | 3210.9306 | 3222.5049 | 3230.1671 |
| Frequencies -- | 3239.5277 | 3266.7073 | 3271.6718 |
| Frequencies -- | 3558.1172 | 3618.9621 | 3712.8257 |

## TH-S

|   |             |             |             |
|---|-------------|-------------|-------------|
| C | 2.37387500  | -0.14203800 | 0.03964000  |
| C | 2.46377100  | -1.53270100 | 0.07723600  |
| S | 3.95803100  | 0.57104400  | -0.03407000 |
| C | 3.77101900  | -2.00060900 | 0.05491900  |
| H | 1.60070000  | -2.17967800 | 0.13097000  |
| C | 4.73944200  | -0.99837400 | -0.00154700 |
| H | 4.03951000  | -3.04700000 | 0.08369800  |
| C | 6.12192100  | -1.25713500 | -0.02209100 |
| H | 6.35825100  | -2.31329500 | 0.00333500  |
| C | 7.20605800  | -0.41162800 | -0.06656300 |
| C | 7.08509900  | 0.99972400  | -0.10625000 |
| C | 8.58934000  | -0.90864600 | -0.07356900 |
| O | 8.68029300  | -2.25259300 | -0.03864100 |
| H | 9.62388100  | -2.48322600 | -0.04504200 |
| O | 9.56995200  | -0.19374000 | -0.10547400 |
| N | 6.98512300  | 2.15009100  | -0.13965000 |
| C | -2.60558200 | 1.63864600  | 0.05946400  |
| C | -3.34970900 | 2.80020600  | 0.06936300  |
| S | -3.67290800 | 0.24521600  | 0.06867700  |
| C | -4.73843000 | 2.59671400  | 0.09008600  |
| H | -2.89688600 | 3.78087700  | 0.06630900  |
| C | -5.08728800 | 1.25974100  | 0.08230800  |
| H | -5.47358900 | 3.38803800  | 0.09806300  |

|   |             |             |             |
|---|-------------|-------------|-------------|
| H | -7.07563800 | 1.48213100  | -0.10831900 |
| C | -6.78711000 | -0.54208500 | 0.11030700  |
| C | -6.23256300 | -1.60814500 | 0.77011600  |
| S | -8.22169100 | -1.02541200 | -0.75846800 |
| C | -6.97409900 | -2.80880600 | 0.58649300  |
| H | -5.35699700 | -1.53970600 | 1.39599700  |
| C | -8.07928300 | -2.65102400 | -0.19188300 |
| H | -6.70070300 | -3.74922700 | 1.04258800  |
| H | -8.82824200 | -3.37826700 | -0.45900600 |
| N | -6.36659100 | 0.77622600  | 0.03566400  |
| C | 1.19990600  | 0.66770400  | 0.05439200  |
| C | 1.08675700  | 2.04624100  | 0.12000000  |
| S | -0.39476900 | -0.04800400 | -0.01038200 |
| C | -0.23088000 | 2.51321400  | 0.12643400  |
| H | 1.94222400  | 2.70476100  | 0.17528300  |
| C | -1.18041500 | 1.50182000  | 0.06494700  |
| H | -0.49378900 | 3.55861800  | 0.18202800  |

|                |           |           |           |
|----------------|-----------|-----------|-----------|
| Frequencies -- | 11.6212   | 25.5948   | 25.8756   |
| Frequencies -- | 35.3280   | 41.2350   | 49.8358   |
| Frequencies -- | 57.1290   | 58.5748   | 67.0752   |
| Frequencies -- | 79.8516   | 94.8683   | 112.1838  |
| Frequencies -- | 136.0354  | 149.6303  | 163.2978  |
| Frequencies -- | 170.4676  | 211.1255  | 226.5050  |
| Frequencies -- | 243.4640  | 272.2720  | 288.4889  |
| Frequencies -- | 307.2345  | 323.8471  | 338.0018  |
| Frequencies -- | 356.2984  | 401.5638  | 404.9089  |
| Frequencies -- | 415.2742  | 444.2944  | 451.7314  |
| Frequencies -- | 487.3023  | 497.2468  | 510.8777  |
| Frequencies -- | 519.5740  | 530.3190  | 555.5160  |
| Frequencies -- | 566.3294  | 584.4072  | 593.2998  |
| Frequencies -- | 606.6060  | 610.8483  | 613.4179  |
| Frequencies -- | 624.8291  | 627.3025  | 661.6393  |
| Frequencies -- | 672.9659  | 676.6223  | 684.9023  |
| Frequencies -- | 704.6517  | 732.0228  | 736.8649  |
| Frequencies -- | 749.7592  | 753.4014  | 776.1388  |
| Frequencies -- | 793.9839  | 814.5816  | 816.0405  |
| Frequencies -- | 821.4417  | 824.9805  | 826.6517  |
| Frequencies -- | 849.0156  | 877.0359  | 914.5027  |
| Frequencies -- | 919.7620  | 922.0485  | 928.9151  |
| Frequencies -- | 934.0595  | 969.2795  | 1060.3002 |
| Frequencies -- | 1065.0902 | 1072.9758 | 1091.4203 |
| Frequencies -- | 1094.5830 | 1103.2438 | 1138.3188 |
| Frequencies -- | 1149.7099 | 1178.8059 | 1210.1996 |
| Frequencies -- | 1234.1586 | 1244.2651 | 1259.8218 |
| Frequencies -- | 1270.7280 | 1293.8624 | 1307.4397 |
| Frequencies -- | 1329.6575 | 1350.7562 | 1361.1864 |
| Frequencies -- | 1393.6900 | 1396.9278 | 1401.8515 |
| Frequencies -- | 1406.7641 | 1473.6133 | 1479.8689 |
| Frequencies -- | 1480.7237 | 1502.9016 | 1517.3061 |
| Frequencies -- | 1550.6976 | 1569.4982 | 1582.2240 |
| Frequencies -- | 1588.4425 | 1722.6898 | 2294.1100 |
| Frequencies -- | 3185.3975 | 3200.7053 | 3205.3672 |
| Frequencies -- | 3206.0406 | 3207.3343 | 3218.7285 |
| Frequencies -- | 3219.5312 | 3224.4650 | 3230.5087 |
| Frequencies -- | 3251.2616 | 3568.9850 | 3706.4108 |

**TH-N**

|   |            |             |            |
|---|------------|-------------|------------|
| C | 2.08665800 | 0.15785000  | 0.00045500 |
| C | 2.20022900 | 1.54858900  | 0.01819300 |
| S | 3.66103900 | -0.58318400 | 0.00172600 |

|   |             |             |             |
|---|-------------|-------------|-------------|
| C | 3.51397800  | 1.99405300  | 0.02843400  |
| H | 1.34606000  | 2.20943600  | 0.01925200  |
| C | 4.46824400  | 0.97516200  | 0.02041400  |
| H | 3.79948700  | 3.03627400  | 0.03975200  |
| C | 5.85297400  | 1.21196600  | 0.02557100  |
| H | 6.10498000  | 2.26462800  | 0.03701000  |
| C | 6.92659700  | 0.34938700  | 0.01837100  |
| C | 6.78506600  | -1.05993100 | 0.00520800  |
| C | 8.31528200  | 0.82681600  | 0.02385300  |
| O | 8.42446800  | 2.17057000  | 0.03536000  |
| H | 9.37119000  | 2.38745900  | 0.03794400  |
| O | 9.28782000  | 0.09946900  | 0.01843600  |
| N | 6.66741600  | -2.20926000 | -0.00522000 |
| C | -2.92431400 | -1.52079300 | -0.01263300 |
| C | -3.69183900 | -2.67014900 | -0.01133600 |
| S | -3.96896500 | -0.10849500 | -0.01785000 |
| C | -5.07365700 | -2.44403900 | -0.02014900 |
| H | -3.25594200 | -3.65855200 | -0.00463300 |
| C | -5.40178700 | -1.09751100 | -0.01489900 |
| H | -5.82269900 | -3.22222100 | -0.01956900 |
| H | -7.39622200 | -1.28861500 | 0.11227400  |
| C | -7.07885000 | 0.72773300  | -0.03046900 |
| C | -6.46938700 | 1.88953900  | -0.46842600 |
| C | -7.41035000 | 2.94281700  | -0.27505200 |
| H | -5.49112300 | 1.98084700  | -0.90441800 |
| C | -8.54909500 | 2.39741100  | 0.26071100  |
| H | -7.25850800 | 3.98206900  | -0.51505500 |
| H | -9.48628500 | 2.84101100  | 0.54725200  |
| N | -6.66569800 | -0.59503200 | 0.02140500  |
| C | 0.89893100  | -0.62626800 | -0.01561800 |
| C | 0.75598800  | -2.00373700 | -0.07038900 |
| S | -0.68244800 | 0.12344300  | 0.03709600  |
| C | -0.56911200 | -2.44357700 | -0.07393500 |
| H | 1.59815500  | -2.68014400 | -0.11345200 |
| C | -1.50028800 | -1.41162000 | -0.02188700 |
| H | -0.85340100 | -3.48380400 | -0.11838200 |
| N | -8.33400000 | 1.04826800  | 0.41169900  |
| H | -8.99363700 | 0.39304400  | 0.80244100  |

|                |          |          |           |
|----------------|----------|----------|-----------|
| Frequencies -- | 9.0846   | 19.8293  | 23.4958   |
| Frequencies -- | 31.0645  | 33.9237  | 45.6800   |
| Frequencies -- | 49.6132  | 57.1389  | 62.4042   |
| Frequencies -- | 76.1059  | 87.3439  | 108.4834  |
| Frequencies -- | 131.5698 | 150.8416 | 162.5263  |
| Frequencies -- | 169.2015 | 224.5726 | 226.0215  |
| Frequencies -- | 248.5054 | 251.4390 | 275.3683  |
| Frequencies -- | 301.4915 | 327.7099 | 333.5580  |
| Frequencies -- | 357.0186 | 391.6430 | 410.1495  |
| Frequencies -- | 416.4679 | 444.9076 | 454.5566  |
| Frequencies -- | 483.5636 | 511.5203 | 519.0553  |
| Frequencies -- | 533.5339 | 543.9223 | 554.7418  |
| Frequencies -- | 585.7562 | 603.5275 | 607.3553  |
| Frequencies -- | 613.7334 | 620.0603 | 625.6176  |
| Frequencies -- | 636.1719 | 639.6814 | 660.9302  |
| Frequencies -- | 672.8102 | 679.7408 | 704.0199  |
| Frequencies -- | 721.9464 | 736.3669 | 749.1772  |
| Frequencies -- | 750.9066 | 775.9180 | 784.9071  |
| Frequencies -- | 788.9975 | 816.5695 | 816.6742  |
| Frequencies -- | 820.2858 | 825.4810 | 876.6342  |
| Frequencies -- | 885.4605 | 895.3832 | 909.7144  |
| Frequencies -- | 919.4126 | 926.9116 | 932.5956  |
| Frequencies -- | 967.0613 | 988.2114 | 1039.3382 |



|                |           |           |           |
|----------------|-----------|-----------|-----------|
| Frequencies -- | 1058.4280 | 1071.3113 | 1089.4845 |
| Frequencies -- | 1102.4235 | 1112.0391 | 1130.1906 |
| Frequencies -- | 1139.3319 | 1176.5788 | 1208.6712 |
| Frequencies -- | 1225.9942 | 1233.2643 | 1255.6335 |
| Frequencies -- | 1264.1259 | 1286.4005 | 1294.9019 |
| Frequencies -- | 1307.6035 | 1330.2853 | 1351.1921 |
| Frequencies -- | 1361.8676 | 1397.1361 | 1398.5788 |
| Frequencies -- | 1407.7032 | 1427.3832 | 1442.8039 |
| Frequencies -- | 1462.4438 | 1481.7109 | 1483.0066 |
| Frequencies -- | 1501.0272 | 1510.0094 | 1544.5187 |
| Frequencies -- | 1570.3534 | 1587.6994 | 1608.3155 |
| Frequencies -- | 1720.9531 | 2293.7534 | 3184.0457 |
| Frequencies -- | 3199.2934 | 3204.1633 | 3205.7536 |
| Frequencies -- | 3216.9117 | 3219.0009 | 3224.3184 |
| Frequencies -- | 3234.2784 | 3247.4391 | 3265.9370 |
| Frequencies -- | 3575.3884 | 3629.9592 | 3707.0257 |

Fig. 1: Calculated absorption spectra of MM6 (TD-CAM-B3LYP/6-311+G(d,p)/SMD), C293 (TD-CAM-B3LYP/6-311+G(d,p)/SMD) and D2 (TD-CAM-B3LYP/6-311+G(3df,3pd)/SMD). The spectra are Gaussianbroadened with 0.3 eV (half width half maximum).

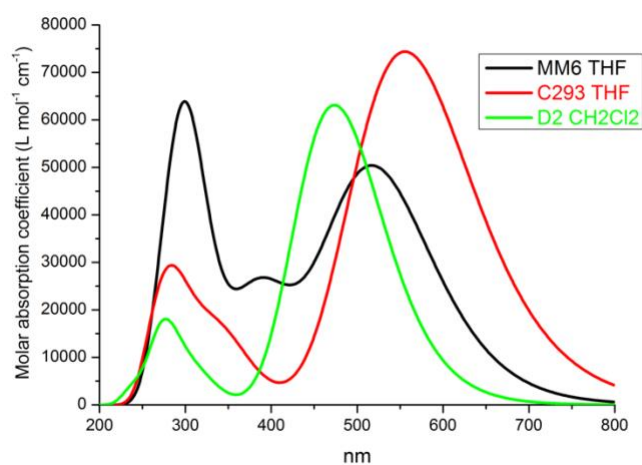

Fig. 2: Main MOs involved in electronic transitions.

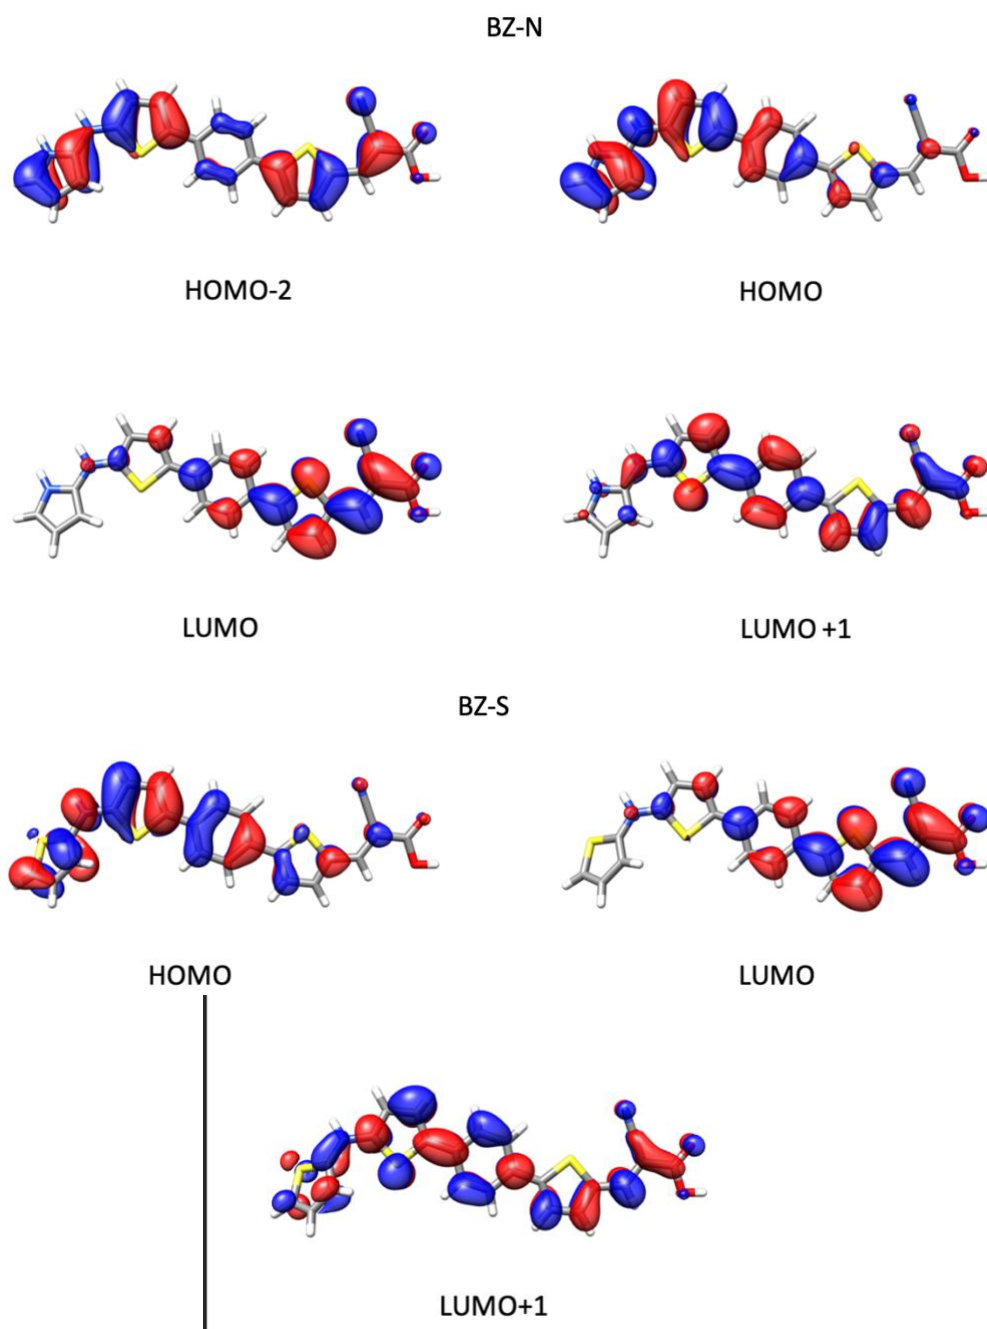

PY-4S

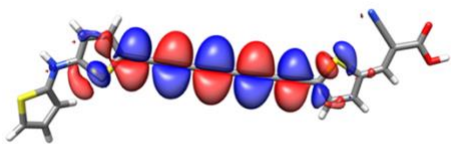

HOMO-2

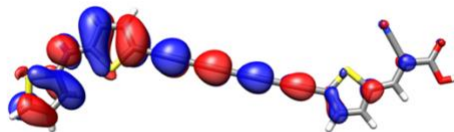

HOMO

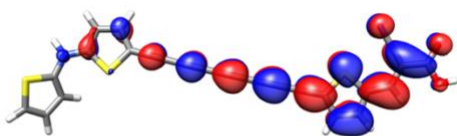

LUMO

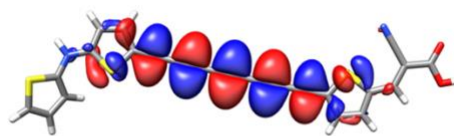

LUMO+1

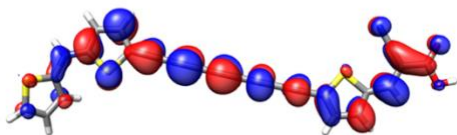

LUMO+2

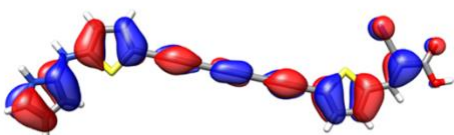

LUMO+3

PY-4N

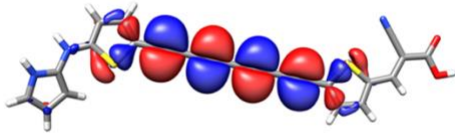

HOMO-2

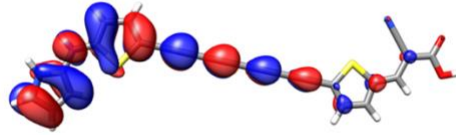

HOMO

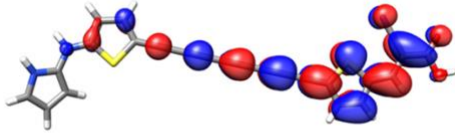

LUMO

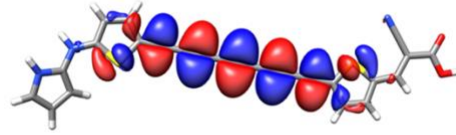

LUMO+1

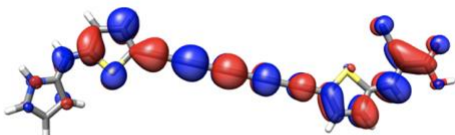

LUMO+2

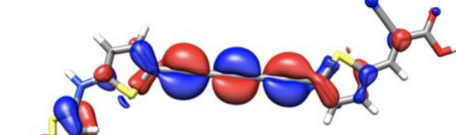

LUMO+3

PY-3S

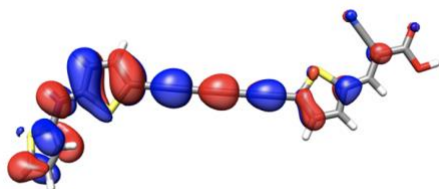

HOMO

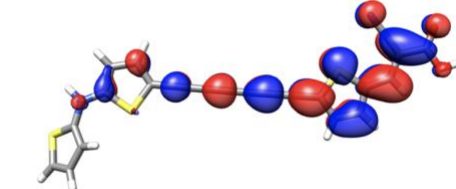

LUMO

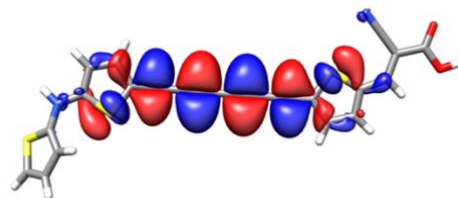

LUMO+1

PY-3N

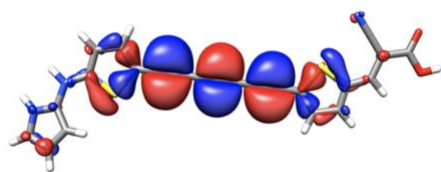

HOMO-3

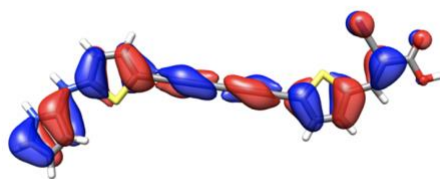

HOMO-2

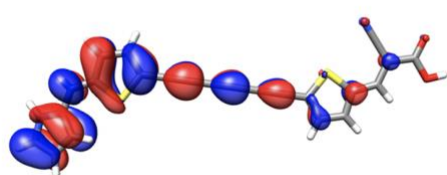

HOMO

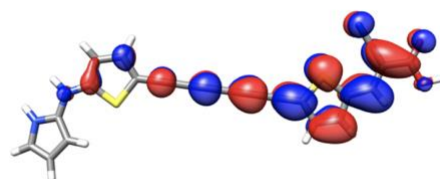

LUMO

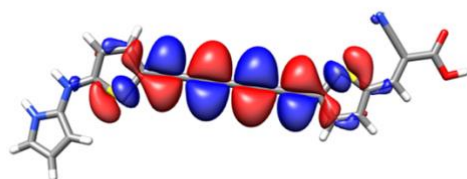

LUMO+1

PY-2S

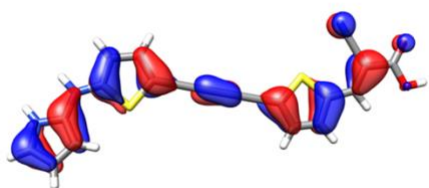

HOMO-6

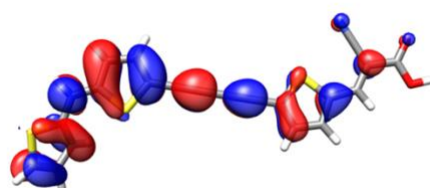

HOMO

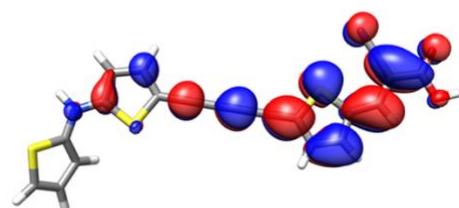

LUMO

PY-2N

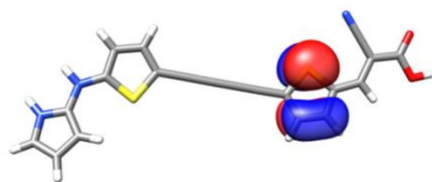

HOMO-6

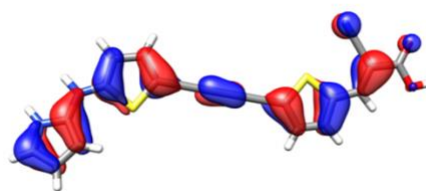

HOMO-2

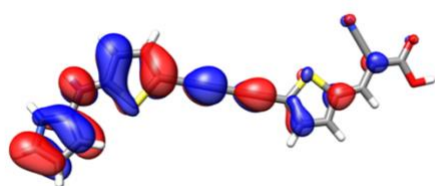

HOMO

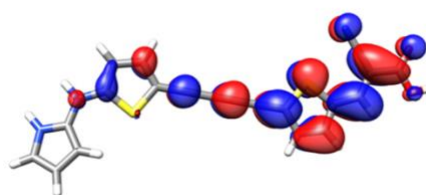

LUMO

PY-1S

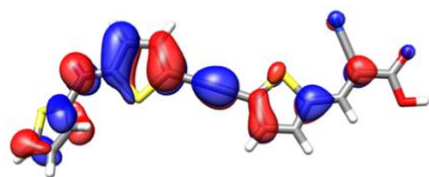

HOMO

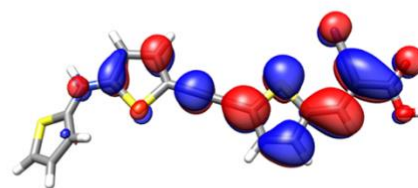

LUMO

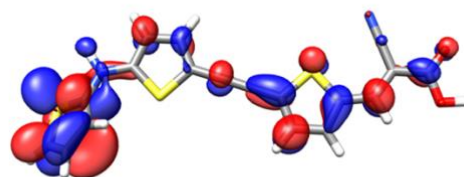

LUMO +2

PY-1N

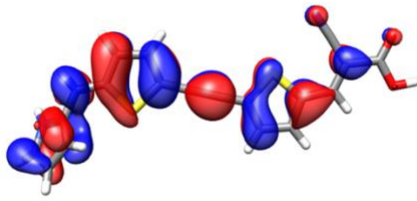

HOMO

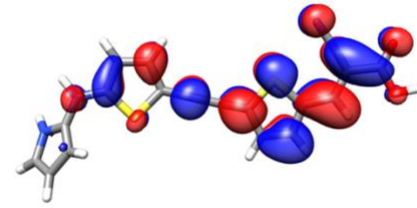

LUMO

TH-S

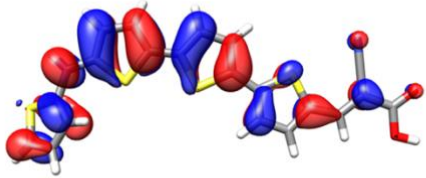

HOMO

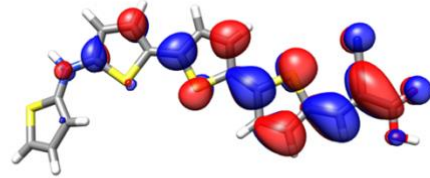

LUMO

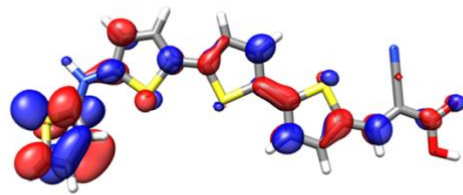

LUMO +2

TH-N

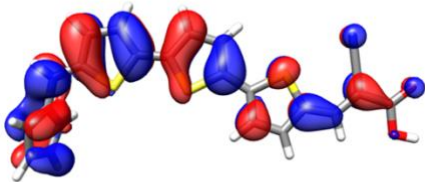

HOMO

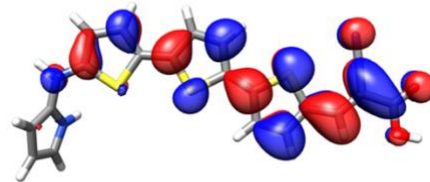

LUMO

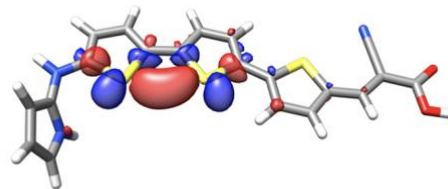

LUMO +3

Table 1: Carbon-Carbon lengths ( $\text{\AA}$ ) for LCCs

| PY-4N | PY-4S | PY-3N | PY-3S | PY-2N        | PY-2S        | PY-N  | PY-S  |
|-------|-------|-------|-------|--------------|--------------|-------|-------|
| 1,228 | 1,226 | 1,226 | 1,225 | 1,224        | 1,223        | 1,219 | 1,218 |
| 1,335 | 1,334 | 1,335 | 1,337 | 1,341        | 1,342        |       |       |
| 1,230 | 1,229 | 1,227 | 1,226 | 1,221        | 1,220        |       |       |
| 1,334 | 1,332 | 1,338 | 1,339 | <b>1,262</b> | <b>1,262</b> |       |       |
| 1,228 | 1,227 | 1,221 | 1,220 |              |              |       |       |
| 1,340 | 1,338 | 1,269 | 1,269 |              |              |       |       |
| 1,221 | 1,220 |       |       |              |              |       |       |
| 1,274 | 1,272 |       |       |              |              |       |       |

Fig. 3: absorption spectra of I—Dye@ $(\text{TiO}_2)_{14}$  at TD-M062X/6-31G(d)/LANL2DZ/SDDALL level. The spectra are Gaussianbroadened with 0.3 eV (half width half maximum).

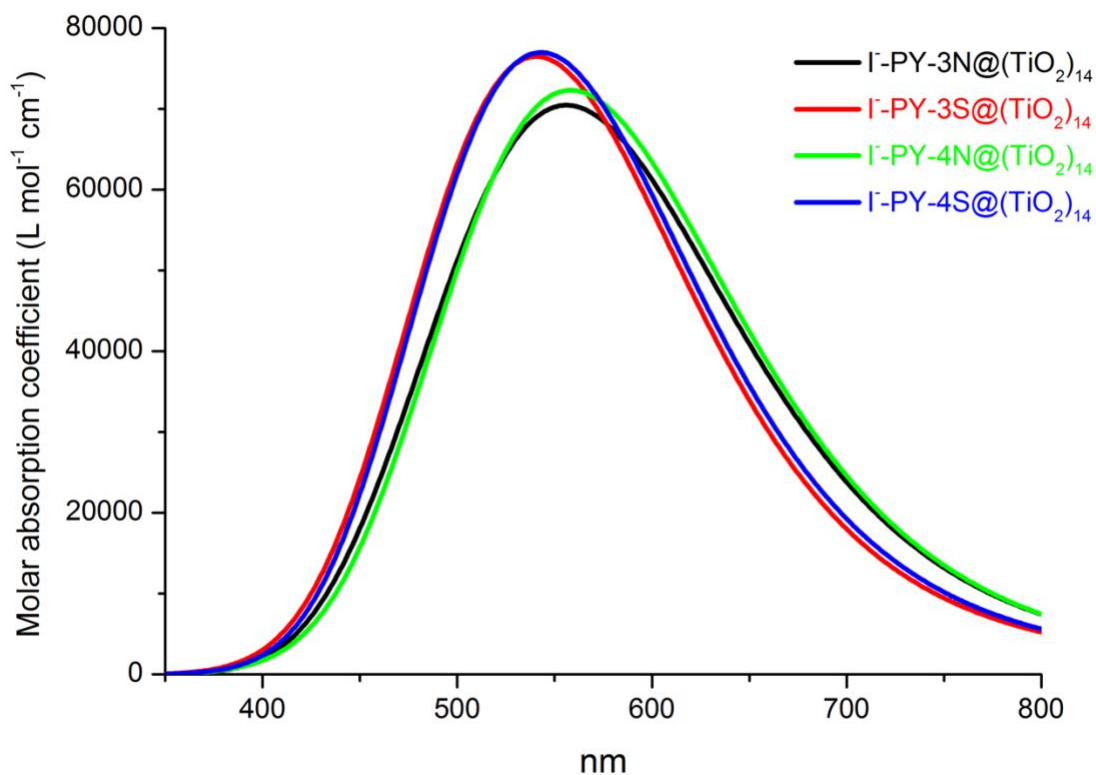

Supplement: d2ra06767f1.pdf [file d2ra06767f1.pdf]
